# Supplementary material for: GIS-Analysis for Active Tectonics Assessment of Wadi Al-Arish, Egypt
Source: MDPI journal article supplement (doi:10.3390/app13042659), 2023-02-18
Supplement: s1 [file s1]

**Table S1.** Basic geometric values of the study catchments/sub-catchments.

| Catchments | Area (km <sup>2</sup> ) | Perimeter (Km) | Elevation Min (m). | Elevation Max (m). | Catch./Sub-catchments | Area (km <sup>2</sup> ) | Perimeter (Km) | Elevation (m) Max. | Elevation (m) Min. |
|------------|-------------------------|----------------|--------------------|--------------------|-----------------------|-------------------------|----------------|--------------------|--------------------|
| C1         | 142.2                   | 100.74         | 4                  | 149                | C45                   | 213.32                  | 74.42          | 525                | 1066               |
| C2         | 359.93                  | 129.46         | 75                 | 743                | C46                   | 141.73                  | 79.51          | 542                | 985                |
| C3         | 248.18                  | 82.30          | 59                 | 896                | C47                   | 493.04                  | 138.80         | 552                | 1311               |
| C4         | 279.98                  | 96.77          | 63                 | 895                | C48                   | 578.38                  | 169.50         | 550                | 1607               |
| C5         | 164.18                  | 76.38          | 93                 | 341                | C49                   | 588.56                  | 122.97         | 688                | 1619               |
| C6         | 402.45                  | 76.38          | 27                 | 462                | C50                   | 593.41                  | 155.53         | 689                | 1632               |
| C7         | 101.74                  | 52.08          | 198                | 498                | C51                   | 224.78                  | 101.46         | 637                | 1351               |
| C8         | 298.59                  | 102.36         | 185                | 677                | Sub-c52               | 33.89                   | 42.77          | 52                 | 13867              |
| C9         | 629.91                  | 151.21         | 201                | 1023               | Sub-c53               | 18.59                   | 28.3176        | 51                 | 110                |
| C10        | 305.46                  | 97.02          | 193                | 900                | Sub-c54               | 26.55                   | 27.9802        | 68                 | 301                |
| C11        | 282.1                   | 92.06          | 190                | 949                | Sub-c55               | 31.16                   | 26.0775        | 67                 | 323                |
| C12        | 309.35                  | 141.82         | 173                | 1030               | Sub-c56               | 20.76                   | 23.4857        | 65                 | 317                |
| C13        | 124.25                  | 70.30          | 190                | 656                | Sub-c57               | 20.33                   | 32.4494        | 79                 | 130                |
| C14        | 104.69                  | 46.42          | 189                | 460                | Sub-c58               | 51.36                   | 38.6446        | 78                 | 410                |
| C15        | 119.73                  | 54.10          | 178                | 908                | Sub-c59               | 67.92                   | 34.9485        | 78                 | 452                |
| C16        | 220.16                  | 92.87          | 189                | 897                | Sub-c60               | 37.64                   | 32.8741        | 128                | 852                |
| C17        | 428.17                  | 114.84         | 111                | 854                | Sub-c61               | 13.3                    | 18.6094        | 121                | 229                |
| C18        | 514.34                  | 145.07         | 118                | 1077               | Sub-c62               | 72.16                   | 42.4348        | 127                | 417                |
| C19        | 373.8                   | 95.34          | 119                | 891                | Sub-c63               | 81.78                   | 46.1221        | 162                | 460                |
| C20        | 816.69                  | 192.45         | 83                 | 1077               | Sub-c64               | 11.69                   | 16.1497        | 140                | 431                |
| C21        | 365.12                  | 96.41          | 339                | 790                | Sub-c65               | 17.58                   | 21.4768        | 164                | 872                |
| C22        | 135.17                  | 61.98          | 322                | 902                | Sub-c66               | 33.1                    | 32.2093        | 164                | 430                |
| C23        | 444.58                  | 115.23         | 314                | 999                | Sub-c67               | 4.34                    | 10.8194        | 193                | 424                |
| C24        | 361.97                  | 130.47         | 276                | 999                | Sub-c68               | 84.07                   | 59.8674        | 189                | 747                |
| C25        | 213.53                  | 93.89          | 312                | 954                | Sub-c69               | 13.69                   | 20.269         | 166                | 249                |
| C26        | 519.08                  | 139.82         | 314                | 999                | Sub-c70               | 32.53                   | 26.6774        | 171                | 864                |
| C27        | 161.52                  | 60.16          | 300                | 533                | Sub-c71               | 70.38                   | 38.4752        | 196                | 424                |
| C28        | 449.87                  | 117.35         | 375                | 796                | Sub-c72               | 43.46                   | 44.4359        | 233                | 348                |
| C29        | 831.56                  | 165.87         | 373                | 965                | Sub-c73               | 59.78                   | 35.6301        | 235                | 407                |
| C30        | 155.53                  | 87.14          | 339                | 588                | Sub-c74               | 13.17                   | 22.4469        | 251                | 318                |
| C31        | 236.84                  | 90.43          | 330                | 565                | Sub-c75               | 92.26                   | 46.4214        | 689                | 1632               |
| C32        | 192.76                  | 75.80          | 322                | 525                | Sub-c76               | 42.73                   | 35.9171        | 239                | 394                |
| C33        | 875.74                  | 171.59         | 293                | 731                | Sub-c77               | 82.99                   | 43.0718        | 255                | 371                |
| C34        | 102.59                  | 66.04          | 460                | 729                | Sub-c78               | 34.87                   | 28.7054        | 288                | 357                |
| C35        | 100.49                  | 46.04          | 438                | 680                | Sub-c79               | 66.21                   | 37.1364        | 265                | 554                |
| C36        | 447.32                  | 115.62         | 523                | 1055               | Sub-c80               | 45.56                   | 62.1239        | 317                | 1049               |
| C37        | 598.67                  | 130.13         | 524                | 1198               | Sub-c81               | 26.22                   | 35.4655        | 345                | 710                |
| C38        | 136.3                   | 63.00          | 493                | 775                | Sub-c82               | 14.16                   | 18.8835        | 352                | 504                |
| C39        | 241.86                  | 78.82          | 496                | 893                | Sub-c83               | 14.95                   | 22.2239        | 361                | 627                |
| C40        | 173.27                  | 81.77          | 526                | 924                | Sub-c84               | 82.52                   | 53.7031        | 351                | 430                |
| C41        | 193.36                  | 87.94          | 525                | 956                | Sub-c85               | 73.34                   | 63.7351        | 350                | 465                |
| C42        | 733.39                  | 184.05         | 416                | 1290               | Sub-c86               | 37.73                   | 34.3131        | 326                | 395                |
| C43        | 254.23                  | 100.50         | 433                | 759                | Sub-c87               | 47.42                   | 33.265         | 324                | 418                |
| C44        | 136.54                  | 63.51          | 486                | 944                | Sub-c88               | 18.16                   | 18.0179        | 322                | 412                |

| Catchments | Area<br>(km²) | Perimeter<br>(Km) | Elevation<br>Min (m). | Elevation<br>Max (m). | Catch./Sub-<br>catchments | Area<br>(km²) | Perimeter<br>(Km) | Elevation<br>(m) Max. | Elevation<br>(m) Min. |
|------------|---------------|-------------------|-----------------------|-----------------------|---------------------------|---------------|-------------------|-----------------------|-----------------------|
| Sub-c89    | 59.47         | 38.8377           | 301                   | 377                   | Sub-c118                  | 17.01         | 32.1494           | 612                   | 828                   |
| Sub-c90    | 20.76         | 31.529            | 298                   | 350                   | Sub-c119                  | 21.92         | 27.3741           | 508                   | 596                   |
| Sub-c91    | 46.26         | 42.2823           | 331                   | 445                   | Sub-c120                  | 10.19         | 17.4765           | 504                   | 553                   |
| Sub-c92    | 9.29          | 13.4584           | 349                   | 410                   | Sub-c121                  | 21.03         | 28.6116           | 451                   | 538                   |
| Sub-c93    | 13            | 17.8339           | 410                   | 525                   | Sub-c122                  | 57.61         | 36.9401           | 449                   | 557                   |
| Sub-c94    | 19.15         | 21.5299           | 415                   | 503                   | Sub-c123                  | 16.2          | 22.7883           | 472                   | 540                   |
| Sub-c95    | 16.78         | 17.1732           | 421                   | 498                   | Sub-c124                  | 30.41         | 24.7175           | 413                   | 562                   |
| Sub-c96    | 15.8          | 19.393            | 438                   | 542                   | Sub-c125                  | 51.1          | 44.824            | 415                   | 559                   |
| Sub-c97    | 19.8          | 20.7229           | 445                   | 566                   | Sub-c126                  | 18.23         | 18.3078           | 403                   | 547                   |
| Sub-c98    | 52.75         | 44.9551           | 451                   | 650                   | Sub-c127                  | 41.33         | 37.2231           | 373                   | 552                   |
| Sub-c99    | 51.19         | 33.9996           | 458                   | 642                   | Sub-c128                  | 37.05         | 27.8489           | 389                   | 547                   |
| Sub-c100   | 13.88         | 23.4076           | 481                   | 547                   | Sub-c129                  | 22.48         | 24.286            | 372                   | 516                   |
| Sub-c101   | 54.76         | 49.3362           | 510                   | 1007                  | Sub-c130                  | 14.06         | 16.1708           | 359                   | 432                   |
| Sub-c102   | 64.52         | 58.0039           | 532                   | 774                   | Sub-c131                  | 70.58         | 42.0085           | 334                   | 503                   |
| Sub-c103   | 8.43          | 17.9213           | 538                   | 600                   | Sub-c132                  | 23.35         | 26.9649           | 318                   | 375                   |
| Sub-c104   | 23            | 21.2219           | 505                   | 713                   | Sub-c133                  | 44.97         | 32.5152           | 288                   | 639                   |
| Sub-c105   | 15.56         | 21.9776           | 491                   | 711                   | Sub-c134                  | 20.06         | 28.4348           | 306                   | 405                   |
| Sub-c106   | 18.79         | 20.5577           | 481                   | 607                   | Sub-c135                  | 30.74         | 29.9919           | 312                   | 399                   |
| Sub-c107   | 17.52         | 18.3282           | 398                   | 461                   | Sub-c136                  | 65.6          | 45.9602           | 274                   | 381                   |
| Sub-c108   | 25.56         | 24.0397           | 398                   | 534                   | Sub-c137                  | 57.33         | 37.4968           | 375                   | 796                   |
| Sub-c109   | 55.85         | 35.5821           | 380                   | 512                   | Sub-c138                  | 57.1          | 42.3958           | 352                   | 513                   |
| Sub-c110   | 13.25         | 17.4812           | 417                   | 513                   | Sub-c139                  | 59.16         | 40.0155           | 381                   | 555                   |
| Sub-c111   | 60.46         | 41.3162           | 436                   | 544                   | Sub-c140                  | 28.84         | 24.3807           | 422                   | 558                   |
| Sub-c112   | 43.95         | 35.0185           | 467                   | 585                   | Sub-c141                  | 16.49         | 28.2183           | 460                   | 643                   |
| Sub-c113   | 16.17         | 23.8879           | 501                   | 578                   | Sub-c142                  | 15.64         | 21.0214           | 469                   | 672                   |
| Sub-c114   | 32.75         | 36.9717           | 517                   | 646                   | Sub-c143                  | 13.07         | 22.9834           | 507                   | 684                   |
| Sub-c115   | 54.48         | 48.5742           | 537                   | 771                   | Sub-c144                  | 12.77         | 16.1529           | 500                   | 668                   |
| Sub-c116   | 11.3          | 21.0697           | 673                   | 848                   | Sub-c145                  | 11.4          | 17.2902           | 477                   | 620                   |
| Sub-c117   | 32.17         | 28.0842           | 644                   | 868                   | Sub-c146                  | 13.4          | 19.3075           | 461                   | 601                   |

**Table S2.** Hi (hypsothetic index) values calculated over the study area.

| Catch. | Hi   | Class | Catch.     | Hi   | Class | Sub-Catch. | Hi   | Class |
|--------|------|-------|------------|------|-------|------------|------|-------|
| 1      | 0.49 | 2     | 50         | 0.49 | 2     | 98         | 0.48 | 2     |
| 2      | 0.48 | 2     | 51         | 0.49 | 2     | 99         | 0.47 | 2     |
| 3      | 0.48 | 2     | Sub-Catch. | Hi   | Class | 100        | 0.50 | 1     |
| 4      | 0.48 | 2     | 52         | 0.66 | 1     | 101        | 0.49 | 2     |
| 5      | 0.48 | 2     | 53         | 0.41 | 2     | 102        | 0.49 | 2     |
| 6      | 0.46 | 2     | 54         | 0.49 | 2     | 103        | 0.47 | 2     |
| 7      | 0.48 | 2     | 55         | 0.48 | 2     | 104        | 0.49 | 2     |
| 8      | 0.49 | 2     | 56         | 0.51 | 1     | 105        | 0.50 | 1     |
| 9      | 0.49 | 2     | 57         | 0.30 | 3     | 106        | 0.47 | 2     |
| 10     | 0.49 | 2     | 58         | 0.49 | 2     | 107        | 0.50 | 1     |
| 11     | 0.49 | 2     | 59         | 0.47 | 2     | 108        | 0.49 | 2     |
| 12     | 0.49 | 2     | 60         | 0.49 | 2     | 109        | 0.48 | 2     |
| 13     | 0.48 | 2     | 61         | 0.50 | 1     | 110        | 0.51 | 1     |
| 14     | 0.48 | 2     | 62         | 0.49 | 2     | 111        | 0.49 | 2     |
| 15     | 0.48 | 2     | 63         | 0.48 | 2     | 112        | 0.49 | 2     |
| 16     | 0.48 | 2     | 64         | 0.49 | 2     | 113        | 0.49 | 2     |
| 17     | 0.48 | 2     | 65         | 0.49 | 2     | 114        | 0.50 | 1     |
| 18     | 0.49 | 2     | 66         | 0.49 | 2     | 115        | 0.49 | 2     |
| 19     | 0.47 | 2     | 67         | 0.49 | 2     | 116        | 0.49 | 2     |
| 20     | 0.48 | 2     | 68         | 0.48 | 2     | 117        | 0.50 | 1     |
| 21     | 0.49 | 2     | 69         | 0.51 | 1     | 118        | 0.49 | 2     |
| 22     | 0.48 | 2     | 70         | 0.48 | 2     | 119        | 0.49 | 2     |
| 23     | 0.48 | 2     | 71         | 0.49 | 2     | 120        | 0.26 | 3     |
| 24     | 0.48 | 2     | 72         | 0.51 | 1     | 121        | 0.49 | 2     |
| 25     | 0.48 | 2     | 73         | 0.49 | 2     | 122        | 0.49 | 2     |
| 26     | 0.49 | 2     | 74         | 0.49 | 2     | 123        | 0.50 | 1     |
| 27     | 0.49 | 2     | 75         | 0.94 | 2     | 124        | 0.50 | 1     |
| 28     | 0.49 | 2     | 76         | 0.48 | 2     | 125        | 0.49 | 2     |
| 29     | 0.49 | 2     | 77         | 0.49 | 2     | 126        | 0.48 | 2     |
| 30     | 0.50 | 2     | 78         | 0.50 | 1     | 127        | 0.49 | 2     |
| 31     | 0.49 | 2     | 79         | 0.49 | 2     | 128        | 0.48 | 2     |
| 32     | 0.49 | 2     | 80         | 0.48 | 2     | 129        | 0.49 | 2     |
| 33     | 0.48 | 2     | 81         | 0.49 | 2     | 130        | 0.49 | 2     |
| 34     | 0.49 | 2     | 82         | 0.49 | 2     | 131        | 0.50 | 1     |
| 35     | 0.49 | 2     | 83         | 0.49 | 2     | 132        | 0.41 | 2     |
| 36     | 0.49 | 2     | 84         | 0.50 | 1     | 133        | 0.49 | 2     |
| 37     | 0.49 | 2     | 85         | 0.49 | 2     | 134        | 0.50 | 1     |
| 38     | 0.49 | 2     | 86         | 0.50 | 1     | 135        | 0.50 | 1     |
| 39     | 0.49 | 2     | 87         | 0.49 | 2     | 136        | 0.49 | 2     |
| 40     | 0.49 | 2     | 88         | 0.48 | 2     | 137        | 0.49 | 2     |
| 41     | 0.49 | 2     | 89         | 0.49 | 2     | 138        | 0.49 | 2     |
| 42     | 0.48 | 2     | 90         | 0.32 | 3     | 139        | 0.49 | 2     |
| 43     | 0.48 | 2     | 91         | 0.49 | 2     | 140        | 0.49 | 2     |
| 44     | 0.49 | 2     | 92         | 0.47 | 2     | 141        | 0.49 | 2     |
| 45     | 0.49 | 2     | 93         | 0.48 | 2     | 142        | 0.49 | 2     |

|    |      |   |    |      |   |     |      |   |
|----|------|---|----|------|---|-----|------|---|
| 46 | 0.46 | 2 | 94 | 0.51 | 1 | 143 | 0.49 | 2 |
| 47 | 0.49 | 2 | 95 | 0.49 | 2 | 144 | 0.48 | 2 |
| 48 | 0.48 | 2 | 96 | 0.50 | 1 | 145 | 0.50 | 1 |
| 49 | 0.49 | 2 | 97 | 0.51 | 1 | 146 | 0.50 | 1 |

**Table S3.** Values of Bs (drainage basin shape) index in the calculated catchments and sub-catchments over the study area.

| Catch. | Bs   | Class | Catch. | Bs   | Class | Catch. | Bs   | Class |
|--------|------|-------|--------|------|-------|--------|------|-------|
| 1      | 4.46 | 1     | 50     | 1.32 | 3     | 99     | 1.92 | 3     |
| 2      | 2.99 | 3     | 51     | 3.61 | 2     | 100    | 2.50 | 3     |
| 3      | 2.52 | 3     | 52     | 4.04 | 1     | 101    | 3.70 | 2     |
| 4      | 2.51 | 3     | 53     | 3.21 | 2     | 102    | 4.84 | 1     |
| 5      | 1.78 | 3     | 54     | 1.14 | 3     | 103    | 5.97 | 1     |
| 6      | 3.75 | 2     | 55     | 1.88 | 3     | 104    | 2.14 | 3     |
| 7      | 2.51 | 3     | 56     | 2.22 | 3     | 105    | 2.67 | 3     |
| 8      | 2.50 | 3     | 57     | 7.6  | 1     | 106    | 1.72 | 3     |
| 9      | 1.74 | 3     | 58     | 2.41 | 3     | 107    | 1.54 | 3     |
| 10     | 1.39 | 3     | 59     | 1.69 | 3     | 108    | 1.85 | 3     |
| 11     | 1.78 | 3     | 60     | 1.87 | 3     | 109    | 2.18 | 3     |
| 12     | 3.98 | 2     | 61     | 3.22 | 2     | 110    | 3.16 | 2     |
| 13     | 2.46 | 3     | 62     | 1.47 | 3     | 111    | 1.60 | 3     |
| 14     | 1.98 | 3     | 63     | 1.49 | 3     | 112    | 3.74 | 2     |
| 15     | 0.66 | 3     | 64     | 1.59 | 3     | 113    | 3.33 | 2     |
| 16     | 1.37 | 3     | 65     | 3.60 | 2     | 114    | 5.25 | 1     |
| 17     | 1.07 | 3     | 66     | 2.39 | 3     | 115    | 6.50 | 1     |
| 18     | 2.81 | 3     | 67     | 2.89 | 3     | 116    | 6.35 | 1     |
| 19     | 2.32 | 3     | 68     | 3.61 | 2     | 117    | 2.02 | 3     |
| 20     | 2.26 | 3     | 69     | 2.93 | 3     | 118    | 4.68 | 1     |
| 21     | 0.66 | 3     | 70     | 1.46 | 3     | 119    | 3.75 | 2     |
| 22     | 2.04 | 3     | 71     | 1.10 | 3     | 120    | 2.83 | 3     |
| 23     | 2.62 | 3     | 72     | 3.34 | 2     | 121    | 5.18 | 1     |
| 24     | 3.55 | 2     | 73     | 2.12 | 3     | 122    | 2.37 | 3     |
| 25     | 3.11 | 2     | 74     | 4.22 | 1     | 123    | 5.1  | 1     |
| 26     | 0.87 | 3     | 75     | 2.05 | 3     | 124    | 1.35 | 3     |
| 27     | 1.51 | 3     | 76     | 2.23 | 3     | 125    | 3.47 | 2     |
| 28     | 1.86 | 3     | 77     | 1.16 | 3     | 126    | 1.32 | 3     |
| 29     | 1.94 | 3     | 78     | 1.93 | 3     | 127    | 2.31 | 3     |
| 30     | 5.07 | 1     | 79     | 1.2  | 3     | 128    | 2.21 | 3     |
| 31     | 3.3  | 2     | 80     | 4.9  | 1     | 129    | 2.81 | 3     |
| 32     | 2.14 | 3     | 81     | 5.28 | 1     | 130    | 1.58 | 3     |
| 33     | 1.83 | 3     | 82     | 3.32 | 2     | 131    | 2.76 | 3     |
| 34     | 3.22 | 2     | 83     | 2.86 | 3     | 132    | 3.49 | 2     |
| 35     | 1.71 | 3     | 84     | 3.16 | 2     | 133    | 0.96 | 3     |
| 36     | 0.99 | 3     | 85     | 6.65 | 1     | 134    | 3.95 | 2     |
| 37     | 2.39 | 3     | 86     | 2.06 | 3     | 135    | 3.40 | 2     |
| 38     | 1.59 | 3     | 87     | 1.21 | 3     | 136    | 2.85 | 3     |
| 39     | 2.41 | 3     | 88     | 1.54 | 3     | 137    | 2.03 | 3     |

|    |      |   |    |      |   |     |      |   |
|----|------|---|----|------|---|-----|------|---|
| 40 | 4.03 | 1 | 89 | 2.72 | 3 | 138 | 3.26 | 2 |
| 41 | 3.87 | 2 | 90 | 5.05 | 1 | 139 | 2.02 | 3 |
| 42 | 4.08 | 1 | 91 | 3.67 | 2 | 140 | 1.78 | 3 |
| 43 | 3.62 | 2 | 92 | 1.80 | 3 | 141 | 3.61 | 2 |
| 44 | 2.57 | 3 | 93 | 1.51 | 3 | 142 | 2.07 | 3 |
| 45 | 1.61 | 3 | 94 | 1.73 | 3 | 143 | 3.28 | 2 |
| 46 | 3.64 | 2 | 95 | 1.50 | 3 | 144 | 2.26 | 3 |
| 47 | 2.38 | 3 | 96 | 1.16 | 3 | 145 | 3.08 | 2 |
| 48 | 3.83 | 2 | 97 | 1.88 | 3 | 146 | 2.04 | 3 |
| 49 | 2.53 | 3 | 98 | 1.94 | 3 |     |      |   |

**Table S4.** Vf (valley-floor width to valley-height ratio) values calculated over the study area.

| Catch. | Vf    | Class | Catch.     | Vf    | Class | Sub-Catch. | Vf    | Class |
|--------|-------|-------|------------|-------|-------|------------|-------|-------|
| 1      | 11.03 | 3     | 50         | 25    | 3     | 98         | 15    | 3     |
| 2      | 24    | 3     | 51         | 1.95  | 2     | 99         | 4.44  | 3     |
| 3      | 8.57  | 3     | Sub-catch. | Vf    | Class | 100        | 15.45 | 3     |
| 4      | 20    | 3     | 52         | 5.2   | 3     | 101        | 2.66  | 3     |
| 5      | 3.69  | 3     | 53         | 20    | 3     | 102        | 17.5  | 3     |
| 6      | 4     | 3     | 54         | 4.35  | 3     | 103        | 1.88  | 2     |
| 7      | 2.06  | 3     | 55         | 7.8   | 3     | 104        | 11.66 | 3     |
| 8      | 0.95  | 1     | 56         | 0.58  | 1     | 105        | 6.66  | 3     |
| 9      | 1.28  | 1     | 57         | 15    | 3     | 106        | 10    | 3     |
| 10     | 1.19  | 1     | 58         | 21    | 3     | 107        | 7.5   | 3     |
| 11     | 4.70  | 3     | 59         | 24    | 3     | 108        | 3     | 3     |
| 12     | 3.12  | 3     | 60         | 5.55  | 3     | 109        | 5.78  | 3     |
| 13     | 6.66  | 3     | 61         | 15.45 | 3     | 110        | 0.89  | 1     |
| 14     | 13.33 | 3     | 62         | 13.71 | 3     | 111        | 4.47  | 3     |
| 15     | 8.8   | 3     | 63         | 12.5  | 3     | 112        | 1.26  | 2     |
| 16     | 4.61  | 3     | 64         | 1.6   | 2     | 113        | 14.28 | 3     |
| 17     | 15.33 | 3     | 65         | 1.90  | 2     | 114        | 4.44  | 3     |
| 18     | 8.83  | 3     | 66         | 17.66 | 3     | 115        | 6.66  | 3     |
| 19     | 50    | 3     | 67         | 2.57  | 3     | 116        | 7.08  | 3     |
| 20     | 40    | 3     | 68         | 2.62  | 3     | 117        | 3.33  | 3     |
| 21     | 6.15  | 3     | 69         | 12    | 3     | 118        | 20    | 3     |
| 22     | 18.57 | 3     | 70         | 2.60  | 3     | 119        | 2     | 2     |
| 23     | 3.73  | 3     | 71         | 3.07  | 3     | 120        | 2.4   | 2     |
| 24     | 9.52  | 3     | 72         | 1.25  | 1     | 121        | 8.57  | 3     |
| 25     | 11.42 | 3     | 73         | 8     | 3     | 122        | 2.12  | 2     |
| 26     | 2.94  | 3     | 74         | 6.95  | 3     | 123        | 2.5   | 3     |
| 27     | 2.85  | 3     | 75         | 16.6  | 3     | 124        | 5.33  | 3     |
| 28     | 11    | 3     | 76         | 5.88  | 3     | 125        | 4.21  | 3     |
| 29     | 8     | 3     | 77         | 10.52 | 3     | 126        | 18.88 | 3     |
| 30     | 4.44  | 3     | 78         | 6.15  | 3     | 127        | 5.26  | 3     |
| 31     | 4.44  | 3     | 79         | 38    | 3     | 128        | 1.77  | 2     |
| 32     | 4.11  | 3     | 80         | 1.58  | 2     | 129        | 2.22  | 2     |
| 33     | 5     | 3     | 81         | 5     | 3     | 130        | 5.88  | 3     |

|    |      |   |    |       |   |     |       |   |
|----|------|---|----|-------|---|-----|-------|---|
| 34 | 1.51 | 2 | 82 | 10    | 3 | 131 | 11.42 | 3 |
| 35 | 4.34 | 3 | 83 | 4     | 3 | 132 | 5     | 3 |
| 36 | 2    | 2 | 84 | 25    | 3 | 133 | 3.05  | 3 |
| 37 | 2.12 | 2 | 85 | 11.42 | 3 | 134 | 3.33  | 3 |
| 38 | 1.22 | 1 | 86 | 20.33 | 3 | 135 | 1.76  | 2 |
| 39 | 2.43 | 2 | 87 | 20    | 3 | 136 | 4     | 3 |
| 40 | 5.71 | 3 | 88 | 14    | 3 | 137 | 5     | 3 |
| 41 | 2.4  | 2 | 89 | 4.2   | 3 | 138 | 2.35  | 2 |
| 42 | 4    | 3 | 90 | 8     | 3 | 139 | 22.72 | 3 |
| 43 | 2.35 | 2 | 91 | 16.66 | 3 | 140 | 1     | 1 |
| 44 | 3.54 | 3 | 92 | 6.85  | 3 | 141 | 1.25  | 2 |
| 45 | 5.83 | 3 | 93 | 11.42 | 3 | 142 | 10    | 3 |
| 46 | 8.57 | 3 | 94 | 6.86  | 3 | 143 | 18.4  | 3 |
| 47 | 1.76 | 2 | 95 | 15.55 | 3 | 144 | 13.33 | 3 |
| 48 | 2.36 | 2 | 96 | 3.78  | 3 | 145 | 8.4   | 3 |
| 49 | 2.20 | 2 | 97 | 14    | 3 | 146 | 6.15  | 3 |

**Table S5.** Smf (mountain-front sinuosity index) values calculated over the study area.

| No. | Smf  | Class |
|-----|------|-------|-----|------|-------|-----|------|-------|-----|------|-------|
| 1   | 2.71 | 3     | 22  | 2.97 | 3     | 43  | -    | -     | 64  | 2.64 | 3     |
| 2   | 1.43 | 1     | 23  | 2.84 | 3     | 44  | 1.54 | 2     | 65  | 2.86 | 3     |
| 3   | 1.89 | 2     | 24  | 1.89 | 2     | 45  | 0.94 | 1     | 66  | 1.61 | 2     |
| 4   | 1.28 | 1     | 25  | 1.68 | 2     | 46  | 1.02 | 1     | 67  | 2.57 | 3     |
| 5   | 1.67 | 2     | 26  | 2.75 | 3     | 47  | 1.62 | 3     | 68  | 1.70 | 2     |
| 6   | 1.62 | 2     | 27  | 2.81 | 3     | 48  | 2.99 | 3     | 69  | 1.52 | 2     |
| 7   | 2.70 | 3     | 28  | 2.77 | 3     | 49  | 3.25 | 3     | 70  | -    | -     |
| 8   | 1.08 | 1     | 29  | 2.04 | 2     | 50  | 2.80 | 3     | 71  | 1.54 | 2     |
| 9   | 1.03 | 1     | 30  | 2.24 | 2     | 51  | 2.75 | 3     | 72  | 2.61 | 3     |
| 10  | 1.36 | 1     | 31  | 2.90 | 3     | 52  | 1.59 | 2     | 73  | 2.83 | 3     |
| 11  | 1.90 | 2     | 32  | 2.71 | 3     | 53  | 1.64 | 2     | 74  | 2.58 | 3     |
| 12  | 2.59 | 3     | 33  | 1.97 | 2     | 54  | 2.48 | 2     | 75  | 2.52 | 3     |
| 13  | 2.58 | 3     | 34  | 2.08 | 2     | 55  | 1.68 | 2     | 76  | 1.60 | 2     |
| 14  | 2.30 | 2     | 35  | 2.40 | 2     | 56  | 1.54 | 2     | 77  | 1.67 | 2     |
| 15  | 3.10 | 3     | 36  | 3.05 | 3     | 57  | 1.65 | 2     | 78  | 2.96 | 3     |
| 16  | 2.73 | 3     | 37  | 2.98 | 3     | 58  | 1.57 | 2     | 79  | 1.53 | 2     |
| 17  | 2.48 | 2     | 38  | 2.68 | 3     | 59  | 2.52 | 3     | 80  | 1.74 | 2     |
| 18  | 3.10 | 3     | 39  | 2.64 | 3     | 60  | 2.77 | 3     | 81  | 2.05 | 2     |
| 19  | 2.05 | 2     | 40  | 1.91 | 2     | 61  | 2.53 | 3     | 82  | 1.71 | 2     |
| 20  | 1.42 | 1     | 41  | 1.82 | 2     | 62  | 1.61 | 2     | 83  | 2.41 | 2     |
| 21  | 2.95 | 3     | 42  | 2.46 | 2     | 63  | 2.55 | 3     |     |      |       |
